# On the assessment of more reliable COVID-19 infected number: the italian case.

Giuseppe Tradigo, Pietro Hiram Guzzi, Pierangelo Veltri<sup>1</sup>

<sup>1</sup>Department of Surgical and Medical Science, Bioinformatics  
Laboratory, University of Catanzaro

March 25, 2020

## Abstract

COVID-19 (SARS-CoV-2) is the most recent pandemic disease the world is currently managing. It started in China at the end of 2019, and it is diffusing throughout Italy, one of the most affected countries, and it is currently spreading through European countries and USA. Patients affected by COVID-19 are identified employing medical swabs applied mainly to (i) citizens with COVID-19 symptoms such as flu or high temperature, or (ii) citizens that had contacts with COVID-19 patients. A percentage of COVID-19 affected patients needs hospitalisation, whereas a portion needs to be treated in Intensive Care Units (ICUs).

Nevertheless, it is a matter of current intuition that COVID-19 infected citizens are more than those detected, and sometime the infection is detected too late. Thus there are many efforts in both tracking people activities as well as diffusing low cost reliable COVID-19 tests for early detection.

Starting from mortality rates of diseases caused by viruses in the same family (e.g. MERS, SARS, H1N1), we study the relations between the number of COVID-19 infections and the number of deaths, through Italian regions. We thus assess several infections being higher than the ones currently measured. We thus focus on the characterisation of the pandemic diffusion by estimating the infected number of

patients versus the number of death. We use such an estimated number of infections, to foresee the effects of restriction actions adopted by governments to constrain virus diffusion. We finally think that our model can support the healthcare system to react when COVID-19 is increasing.

## 1 Introduction

The coronavirus disease COVID-19 was identified in Wuhan (China) on December 2019 [9]. The virus diffusion has been surprisingly rapid. Until now, COVID-19 has killed more people than SARS and MERS combined, despite the lower case fatality rate [8]. Due to the lack of vaccines and targeted therapies for preventing the diffusion [3], many governments adopted severe containment measures for minimising interactions among people and reducing their movements. To date the COVID-19 virus caused a total of 398,107 confirmed cases around the world, of which 103,334 recovers and 17,453 deaths. In China 80,981 have been the confirmed cases with more than 3,000 deaths. Starting from mid-February, the virus diffused in the northern regions of Italy [12, 10]. The emergency is mainly due to severe illness by pneumonia requiring hospitalisation in Intensive Care Units (ICUs) with use of breathing ventilator supports. In [5] we studied the correlation among infections and ICU beds, to support strategies and measures for COVID-19.

At the time of this study, 23rd of March, COVID-19 is spreading in Italy and in more than 1 month a large number of both deaths and infections has been registered. Such numbers are diffused differently among the 20 Italian regions with different administration, economics and logistic background. Italian government adopted containment measures in mainly 4 different milestone dates as summarised in Table 2.

The percentage of death in China reports a ratio among death and infection of about 4.3%. Starting from the analysis of number of death with respect to number of identified infected in Italy, we map the percentage in Figure 1. The percentage follows an increasing law showing that the number of measured infected persons is probably underestimated.

The Coronaviridæ family contains many viruses, seven of which are known to be responsible for human diseases (229E, NL63, OC43, HKU1, MERS-CoV, SARS-CoV, and SARS-CoV-2) [7]. One of the main differences between the novel virus and the previous ones is its high spreading rate. Table

31 1 reports the percentage of death known from Coronaviridae family viruses  
32 exploited recently. We started observing that death percentage has an av-  
33 erage value with respect to infected cases for all viruses. We report about  
34 hypotheses on a death percentage and we extract the number of infections.  
35 We compare such a number with respect to officially diffused infected ones.  
36 We finally use estimated numbers to evaluate containment measures with  
37 respect to infection diffusion.

| Disease                                    | CFR     |
|--------------------------------------------|---------|
| Influenza A virus subtype H5N1             | ~ 60.0% |
| Middle Eastern Respiratory Syndrome (MERS) | 35.0%   |
| Severe acute respiratory syndrome (SARS)   | 11.0%   |
| Coronavirus disease 2019 (COVID-19 )       | ~ 4.3%  |
| Spanish (1918) flu                         | ~ 2.5%  |
| Asian (1956–58) flu                        | ~ 0.1%  |
| Hong Kong (1968–69) flu                    | ~ 0.1%  |
| Influenza A, typical pandemics             | < 0.1%  |

Table 1: Case Fatality Rates (CFR) values for flu and diseases caused by Coronaviridae virus. Even if COVID-19 virus shows a lower mortality rate, it killed more people than SARS-Cov1 (8098 cases and 774 deaths) and MERS-Cov (2494 cases and 858 deaths) combined. However we claim that the current rate of 4.3 is over estimated due to the bias in the swab strategy.

## 38 2 Infections Number Estimation

39 We start from the analysis of epidemiological data from Wuhan city (China,  
40 Hubey region). As reported in [6, 4] about a third of infected patients be-  
41 came critical thus requiring ICU admission and breathing aids, due to severe  
42 pneumonia. The lesson learned from China has been used in other countries,  
43 such as Singapore and Italy, for preparing a correct strategy for emergency  
44 management.

45 In Italy <sup>1</sup> on March 22, we report a total of 59,138 total cases (detected  
46 from 258,402 swab tests), of which 46,638 currently positives, 5,476 deaths

---

<sup>1</sup><http://www.salute.gov.it/portale/nuovocoronavirus/dettaglioContenutiNuovoCoronavirus.jsp>

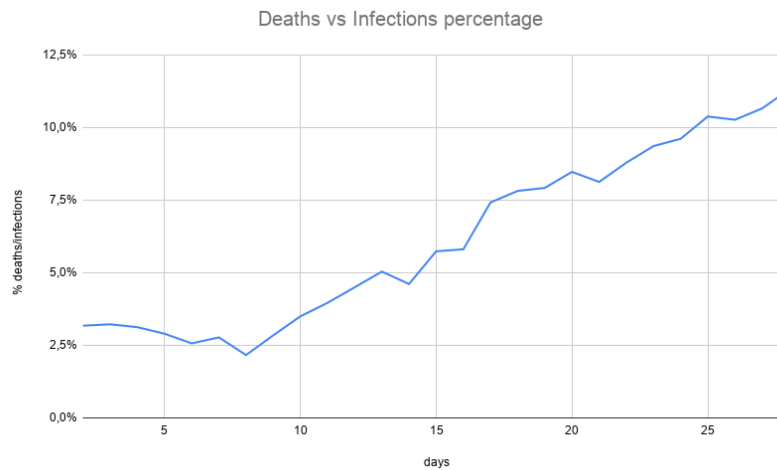

Figure 1: We report the percentage of deaths versus infections (i.e. CFR) in Italy. The value starts from acceptable rates but it reaches values above 11%, which is clearly not comparable with CFRs for similar viruses in the same family not with data from China or even world values estimated by the WHO.

47 and 7,024 recovered patients. Regarding infected people: 23,783 are treated  
48 in their homes since they do not have severe ill, 22,855 patients have been  
49 hospitalised, and 3,009 patients have been admitted to ICUs.

50 At the date of March 23<sup>rd</sup>, while the situation in China seems to be  
51 now under control [11], the virus is continuing the diffusion in Italy and  
52 rapidly growing in other countries throughout the world [2]. Following Italy  
53 and China examples, other governments are implementing strict containment  
54 measures in order to dampen the spread of the infection. One of the main  
55 problems is related to the exponential diffusion of infections and also to the  
56 modality and protocols adopted for swab testing.

57 However, patients needing hospitalisation are fortunately a low percent-  
58 age.

59 Nevertheless, in some cases, COVID-19 causes severe pneumonia, which  
60 requires respiratory support and can lead to death, especially in the presence  
61 of co-morbidities. Patients with severe pneumonia need to be treated in ICUs  
62 with the use of mechanical ventilators [1].

63 By analysing the Case Fatality Rates (CFR), we observe a value starting

64 from low figures and increasing towards levels above 11%. Such a value seems  
65 not compatible with CFRs of other viruses of the same family and could be  
66 imputed to a bias in the choice of the swab test strategy. These tests are  
67 preferably performed on hub people, physicians, law enforcement agents and  
68 politicians and on people that have contact with infected ones. Some studies  
69 agree that COVID-19 CFR should be around 1 – 2% and it is for sure below  
70 4% [8].

71 Table 1 reports WHO’s CFR rate for COVID-19 being equal to 4.3%,  
72 which suffers the same problems we have just described. We claim that the  
73 total number of detected infections is much lower than the real ones due to  
74 the bias described above. We observe that we can derive the real cases of  
75 infections by exploiting the most reliable data available, which is the number  
76 of COVID-19 deaths. We can thus estimate the real infections by using the  
77 current number of deaths, starting by an hypothesis on the CFR value. We  
78 simulate three scenarios for CFR (1%, 2% and 3%) which are reported in  
79 Figure 2, in which we give an idea of the difference between measured data  
80 versus real once. The calculated values show 391.4% ( $CFR = 3\%$ ) more  
81 infections with respect to the measured ones, up to 1174% ( $CFR = 1\%$ ) in  
82 the worst scenario.

83 Such information can be useful for governments to plan actions for a  
84 better swab testing protocol and for ICU beds and resources strengthening  
85 at both a national and regional levels.

86 Finally, in Figure 2 we show the measured total infections (Y axis) per  
87 day (X axis) evaluated by using the above reported swab testing protocol  
88 and the scenarios of predicted infections for the three CFR values resulting  
89 in this study. The blue (i.e. lower) curve represents the number of recognised  
90 positive cases of the Italian official dataset.

### 91 **3 Effects of Containment on COVID-19 dif-** 92 **fusion**

93 Governments are implementing containment plans to reduce the number of  
94 movements and also planning to track people movements to react to the ex-  
95 ponential growth of infected patients. These measures has been implemented  
96 and universally applied to the whole population to reduce the probability of  
97 contacts in the hope of blocking the virus infections. The effects of such

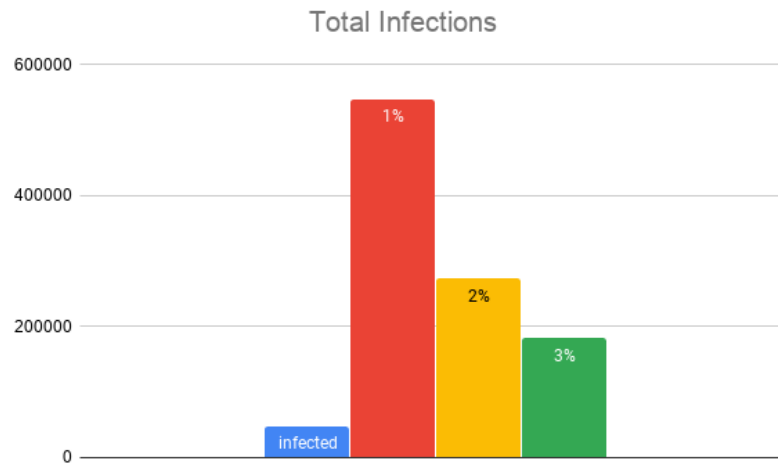

Figure 2: In blue the total infections currently detected in Italy via swab tests. The other bars report three scenarios with different Case Fatality Rates:  $CFR = 1\%$  with 547,600 infections (1174.1% more than currently detected),  $CFR = 2\%$  with 273,800 infections (587.1% more than currently detected) and  $CFR = 3\%$  with 182,533 infections (391.4% more than currently detected).

98 measures need several days for their effect to be seen. The most exposed  
99 people are the so-called hubs (or people having many social contacts), which  
100 have the highest probability of spreading the infection due to their jobs (e.g.  
101 law enforcement, physicians). For instance, the Chinese government applied  
102 severe mobility restrictions within the infected regions in order to block the  
103 virus infection [12].

104 We here report the effects of Italian containment measurements, by con-  
105 sidering the main three events related to the red zones definitions, as reported  
106 in Table 2.

107 We plot the number of infections considering the first three above reported  
108 events. The last one (i.e. complete lockdown of March 22<sup>nd</sup>) is too recent to  
109 observe any impact on data. We plot such infections related to the number  
110 of performed swabs thus to have comparable infection trends in the three  
111 different time intervals: (i) day 0 to first containment event; (ii) from first  
112 containment to second one and (iii) from the second one to the extension of  
113 the red zone to the whole country.

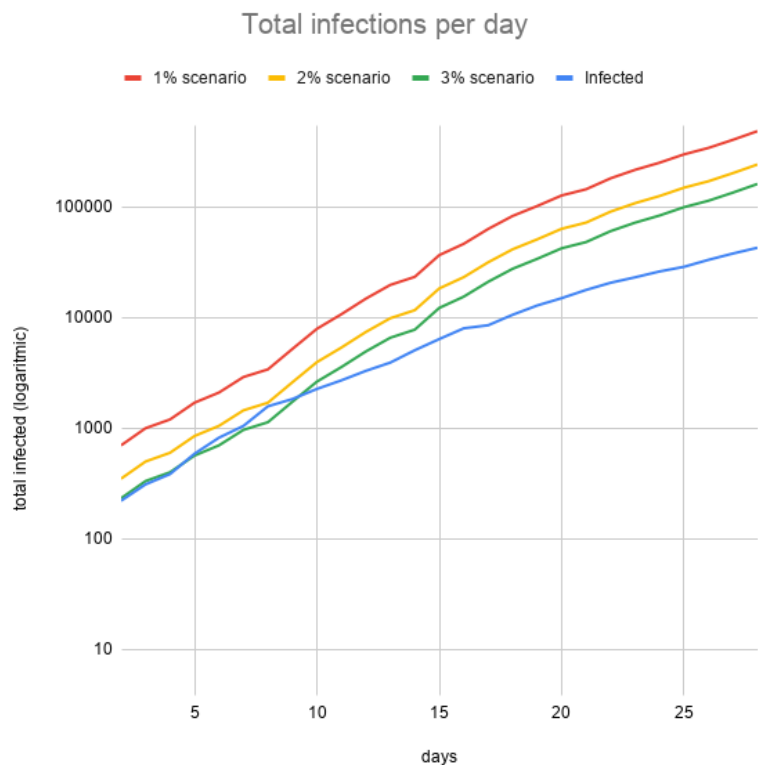

Figure 3: The figure reports infection levels in the three envisioned Case Fatality Rates scenarios (1%, 2% and 3%) compared to the current total COVID-19 infections detected via the swab tests. The curves are reported in the interval from February 24<sup>th</sup> to March 22<sup>nd</sup> 2020. Please note that the Y axis is logarithmic.

114 As evidenced in Figure 4, even if effects could be identified in a time delay  
115 from any containment constraint, the upper trend has a slope that is lower  
116 than the other two ones. The second one can be considered with a marginal  
117 reaction with respect to the first one due to a delay in the application of  
118 containment measures.

| Date                         | Event                                                                                            |
|------------------------------|--------------------------------------------------------------------------------------------------|
| March, 1 <sup>st</sup> 2020  | first red zone in Codogno city (Lombardia region)                                                |
| March, 8 <sup>th</sup> 2020  | - red zone for the entire Lombardia region<br>- first containment measures for the whole country |
| March, 11 <sup>th</sup> 2020 | red zone for whole Italy                                                                         |
| March, 22 <sup>nd</sup> 2020 | complete lockdown except for essential activities                                                |

Table 2: Containment measures and red zones definitions in Italy during COVID-19 emergency.

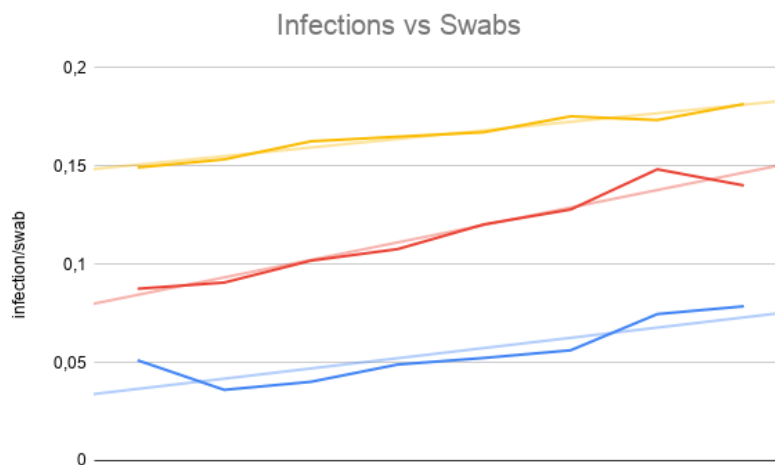

Figure 4: The figure reports infections versus swabs in three time windows: (i) before the first red zone of Codogno, (ii) during the definition of the red zone in the Lombardia region and (iii) after the red zone had been expanded to the whole country.

## 119 4 Scaling model at Regional distribution

120 Italy is divided in 20 regions that manage health structure in autonomy, un-  
 121 der the central guidelines and funds. ICU beds resources as well as COVID-  
 122 19 management and strategies follow central government guidelines. Nev-  
 123 ertheless, regions and towns can be characterised by containment measure-  
 124 ments. This allows a scalability in terms of rules and allows quarantine for  
 125 large set of citizens. We here show that the above reported intuition and  
 126 measurements are scalable also at regional and sub-regional scale.



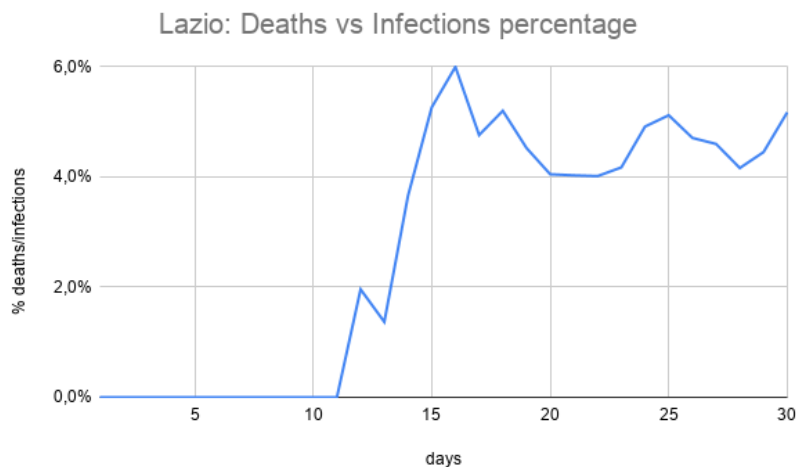

Figure 5: The figure depicts CFR values for the Lazio region. The value reaches figures equal to 6%, which is clearly related to the known bias about the currently adopted swab test protocol.

127 We report the case of a large south region, where infections is growing up  
128 at with a time delay with respect to north Italian region (Lombardia) mostly  
129 due to workers and students moved from north to south of Italy after first  
130 containment measurements in north of Italy.

131 Figure 5 reports the infection rate of Lazio Region (central one) measured  
132 respect to number of death with different hypothesis of death rate as in Figure  
133 2

134 From such a Figure, the CFR value for the Lazio Region varies with  
135 respect to swab tests. If we consider the different CFR values reported above,  
136 the number of infected cases are plotted in Figure 6.

## 137 5 Conclusion

138 The emergency of COVID-19 is related to an aggressive virus that diffuses  
139 rapidly and strongly stresses the resistance of health structures. We started  
140 from observation of death percentage from previous coronavirus family viruses  
141 and we inferred the number of infections starting from CFR rates. The cal-  
142 culated infection levels should be considered to be more reliable than the

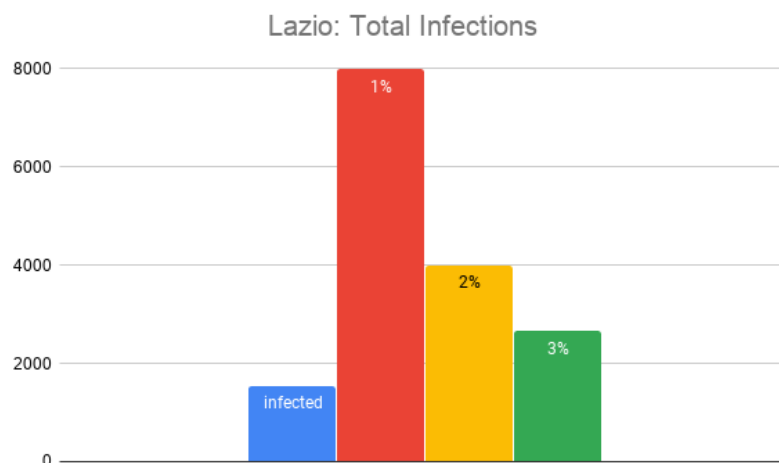

Figure 6: In blue the total infections (1,545) currently detected in the Lazio region via swab tests. The other bars report three scenarios with different Case Fatality Rates:  $CFR = 1\%$  (8,000 infections, +517.8%),  $CFR = 2\%$  (4,000 infections, +258.9%) and  $CFR = 3\%$  (2,666 infections, +172.6%).

143 current ones.

## 144 **6 Contributors**

145 GT was responsible for data analysis and statistics, and writing of the manuscript.  
146 PHG was responsible for data analysis and writing of the manuscript. PV  
147 was responsible for data analysis and writing of the manuscript. All the  
148 authors read and approved the manuscript.

## 149 **7 Declarations of interest**

150 We declare no competing interests.

## 151 8 Acknowledgments

152 We thank Italian Protezione Civile for freely providing online data thus al-  
153 lowing studies on COVID-19 . We thank Prof. Gianluca Pollastri for his  
154 useful suggestions.

## 155 References

- 156 [1] Yaseen M Arabi, Robert Fowler, and Frederick G Hayden. Critical care  
157 management of adults with community-acquired severe respiratory viral  
158 infection. *Intensive Care Medicine*, pages 1–14, 2020.
- 159 [2] Matteo Chinazzi, Jessica T. Davis, Marco Ajelli, Corrado Gioannini,  
160 Maria Litvinova, Stefano Merler, Ana Pastore y Piontti, Kunpeng Mu,  
161 Luca Rossi, Kaiyuan Sun, Cécile Viboud, Xinyue Xiong, Hongjie Yu,  
162 M. Elizabeth Halloran, Ira M. Longini, and Alessandro Vespignani. The  
163 effect of travel restrictions on the spread of the 2019 novel coronavirus  
164 (covid-19) outbreak. *Science*, 2020.
- 165 [3] Carlos del Rio and Preeti N Malani. Covid-19—new insights on a rapidly  
166 changing epidemic. *Jama*, 2020.
- 167 [4] Weijie Guan, Zheng-yi Ni, Yu Hu, Wenhua Liang, Chun-quan Ou, Jian-  
168 xing He, Lei Liu, Hong Shan, Chun-liang Lei, David SC Hui, et al. Clin-  
169 ical characteristics of coronavirus disease 2019 in china. *New England*  
170 *Journal of Medicine*, 2020.
- 171 [5] Pietro Hiram Guzzi, Giuseppe Tradigo, and Pierangelo Veltri. Intensive  
172 care unit resource planning during covid-19 emergency at the regional  
173 level: the italian case. *medRxiv*, 2020.
- 174 [6] Chaolin Huang, Yeming Wang, Xingwang Li, Lili Ren, Jianping Zhao,  
175 Yi Hu, Li Zhang, Guohui Fan, Jiuyang Xu, Xiaoying Gu, et al. Clini-  
176 cal features of patients infected with 2019 novel coronavirus in wuhan,  
177 china. *The Lancet*, 395(10223):497–506, 2020.
- 178 [7] Roujian Lu, Xiang Zhao, Juan Li, Peihua Niu, Bo Yang, Honglong Wu,  
179 Wenling Wang, Hao Song, Baoying Huang, Na Zhu, et al. Genomic char-  
180 acterisation and epidemiology of 2019 novel coronavirus: implications

- 181 for virus origins and receptor binding. *The Lancet*, 395(10224):565–574,  
182 2020.
- 183 [8] Elisabeth Mahase. Coronavirus: covid-19 has killed more people than  
184 sars and mers combined, despite lower case fatality rate, 2020.
- 185 [9] Monica Malta, Anne W Rimoin, and Steffanie A Strathdee. The coron-  
186 avirus 2019-ncov epidemic: Is hindsight 20/20? *EClinicalMedicine*, 20,  
187 2020.
- 188 [10] World Health Organization et al. Coronavirus disease 2019 (covid-19):  
189 situation report, 51. 2020.
- 190 [11] Fariba Rezaeetalab, Mahnaz Mozdourian, Mahnaz Amini, Zahra Javi-  
191 darabshahi, and Farzaneh Akbari. Covid-19: A new virus as a poten-  
192 tial rapidly spreading in the worldwide. *Journal of Cardio-Thoracic*  
193 *Medicine*, 8(1):563–564, 2020.
- 194 [12] Joseph T Wu, Kathy Leung, and Gabriel M Leung. Nowcasting and  
195 forecasting the potential domestic and international spread of the 2019-  
196 ncov outbreak originating in wuhan, china: a modelling study. *The*  
197 *Lancet*, 395(10225):689–697, 2020.
